# Supplementary material
Source: publisher figshare collection journal article supplement (https://acs.figshare.com/ndownloader/files/4682704)
Supplement: Supplementary file 1 [file 4682704]

# Oxidation of L-Cysteine at a Fluorosurfactant-Modified Gold Electrode: Lower Overpotential and Higher Selectivity

*Zuofeng Chen, Huzhi Zheng, Chao Lu, and Yanbing Zu\**

Department of Chemistry, The University of Hong Kong, Pokfulam Road, Hong Kong, China

## Supporting Information

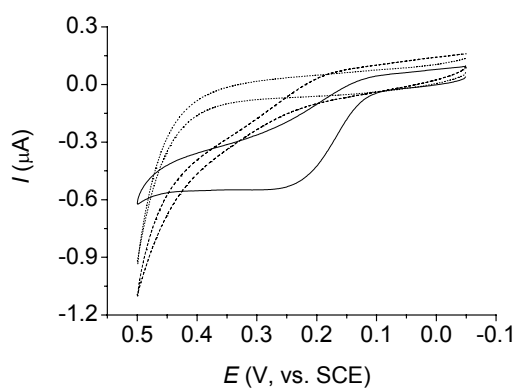

**Figure S1.** Cyclic voltammograms of CySH-Au (dotted line), and 100  $\mu\text{M}$  CySH at bare Au (dashed line) or FSO-Au (solid line) electrodes. Scan rate, 10 mV/s. Solution, 0.15 M PBS (pH 7.0). The CySH-Au electrode was obtained by dipping a clean Au electrode in 1 mM CySH solution for 5 min followed by thoroughly water rinsing. Since the oxidative desorption of the adsorbed CySH at Au or FSO-Au electrodes started at  $\sim 0.4$  V, the oxidation waves observed in the potential region from 0.1 to 0.4 V should be attributed to the oxidation of CySH molecules in solution.

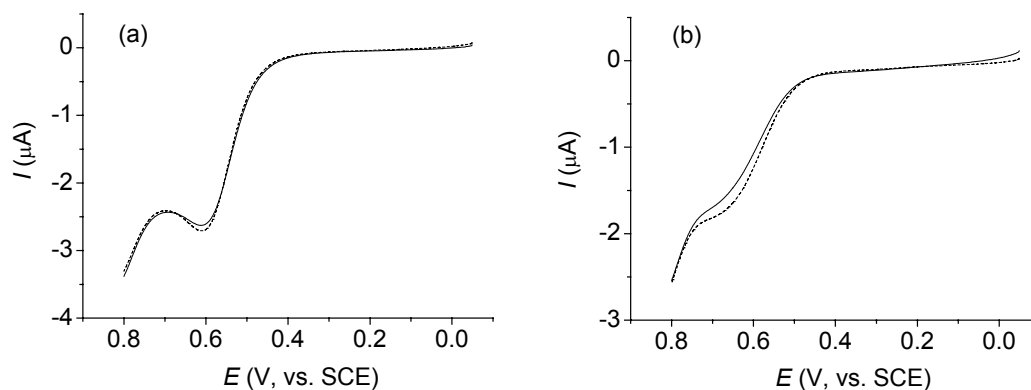

**Figure S2.** Linear sweep voltammograms of Triton-Au (solid line) and bare Au (dashed line) electrodes after dipping in 1 mM CySH (a) or cystine (b) solutions for 5 min and thoroughly water rinsing. Scan rate, 10 mV/s. Solution, 0.15 M PBS (pH 7.0).

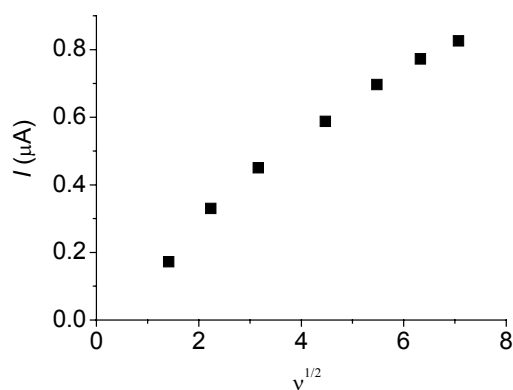

**Figure S3.** Plot of peak current (background signal subtracted) versus square root of scan rate ( $V^{1/2}$ ) obtained at the FSO-Au electrode. Solution, 0.15 M PBS (pH 7.0) containing 100 μM CySH.

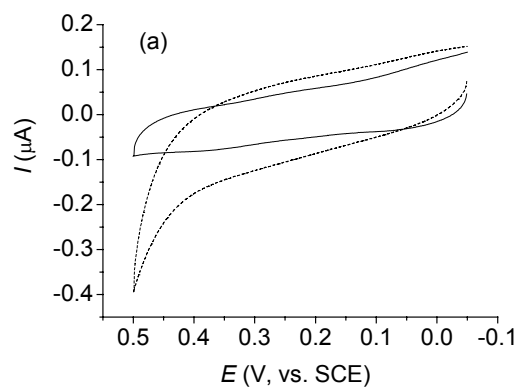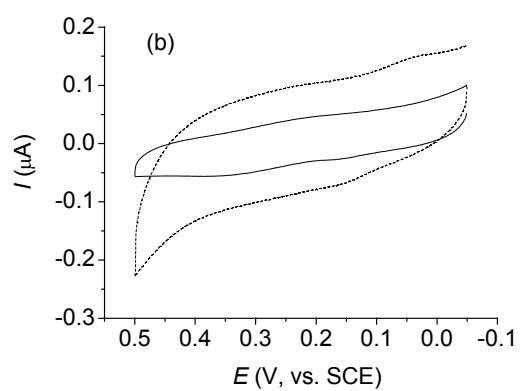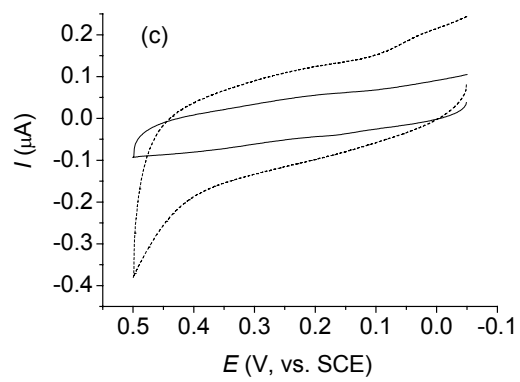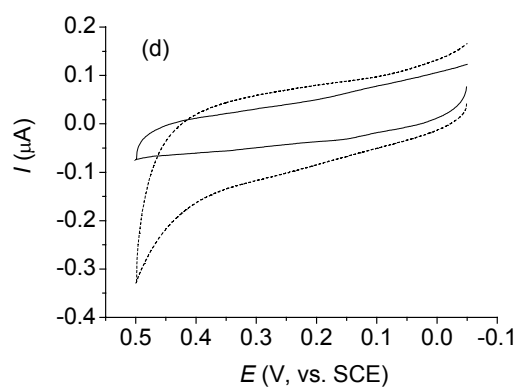

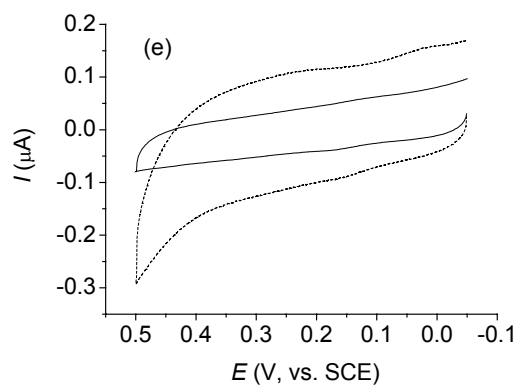

**Figure S4.** Cyclic voltammograms of 100  $\mu\text{M}$  cystine (a), methionine (b), tyrosine (c), tryptophan (d), and oxalate (e) at FSO-Au (solid line) and bare Au (dashed line) electrodes. Scan rate, 10 mV/s. Solution, 0.15 M PBS (pH 7.0).
